# Supplementary material
Source: publisher figshare collection journal article supplement (https://acs.figshare.com/ndownloader/files/4612798)
Supplement: Supplementary file 1 [file 4612798]

## Supporting Information

### Low Temperature Raman Spectroscopy of Individual Single-Wall Carbon Nanotubes and Single-Layer Graphene

*Li Zhang,<sup>†</sup> Zhang Jia,<sup>||</sup> Limin Huang,<sup>||</sup> Stephen O'Brien,<sup>||</sup> Zhonghua Yu<sup>†,\*</sup>*

<sup>†</sup> Department of Chemistry, City College of New York, New York, NY 10031

<sup>||</sup> Department of Applied Physics & Applied Mathematics, Columbia University, New York, NY 10027

\* Corresponding author. Email: [zyu@sci.ccny.cuny.edu](mailto:zyu@sci.ccny.cuny.edu).

**Figure S1:**

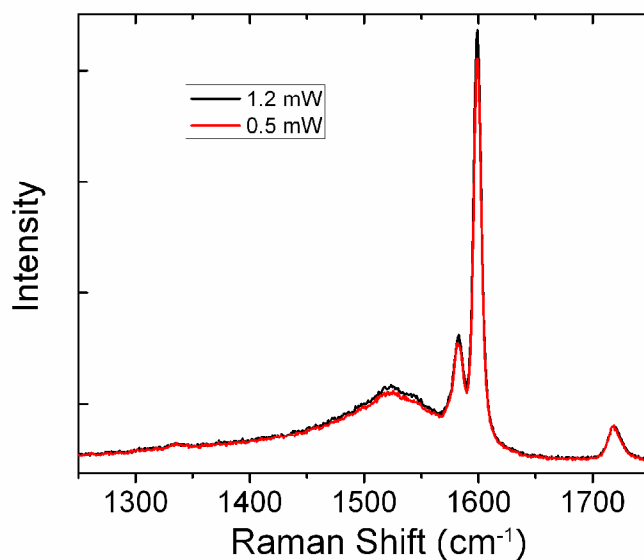

**Figure S1.** Raman spectra of a metallic nanotube and a semiconducting nanotube collected from the same laser spot with two different laser power levels.
